## CORRECTION

# Correction: Evaluation of the impact of COVID-19 pandemic on hospital admission related to common infections: Risk prediction models to tackle antimicrobial resistance in primary care

Ali Fahmi, Victoria Palin, Xiaomin Zhong, Ya-Ting Yang, Simon Watts, Darren M. Ashcroft, Ben Goldacre, Brian MacKenna, Louis Fisher, Jon Massey, Amir Mehrkar, Seb Bacon, the OpenS.A.F.E.L.Y. Collaborative, Kieran Hand, Tjeerd Pieter van Staa

In [Fig 2](#), the legend that describes the meaning of each color used in the lines should have been included. Please see the correct [Fig 2](#) here.

## Reference

1. Fahmi A, Palin V, Zhong X, Yang Y-T, Watts S, Ashcroft DM, et al. Evaluation of the impact of COVID-19 pandemic on hospital admission related to common infections: Risk prediction models to tackle antimicrobial resistance in primary care. *PLoS One*. 2024;19(12): e0311515. <https://doi.org/10.1371/journal.pone.0311515> PMID: [39739781](https://pubmed.ncbi.nlm.nih.gov/39739781/)

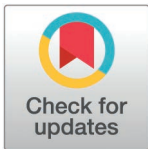

## OPEN ACCESS

**Citation:** Fahmi A, Palin V, Zhong X, Yang Y-T, Watts S, Ashcroft DM, et al (2025) Correction: Evaluation of the impact of COVID-19 pandemic on hospital admission related to common infections: Risk prediction models to tackle antimicrobial resistance in primary care. *PLoS ONE* 20(3): e0321408. <https://doi.org/10.1371/journal.pone.0321408>

**Published:** March 28, 2025

**Copyright:** © 2025 Fahmi et al. This is an open access article distributed under the terms of the [Creative Commons Attribution License](https://creativecommons.org/licenses/by/4.0/), which permits unrestricted use, distribution, and reproduction in any medium, provided the original author and source are credited.

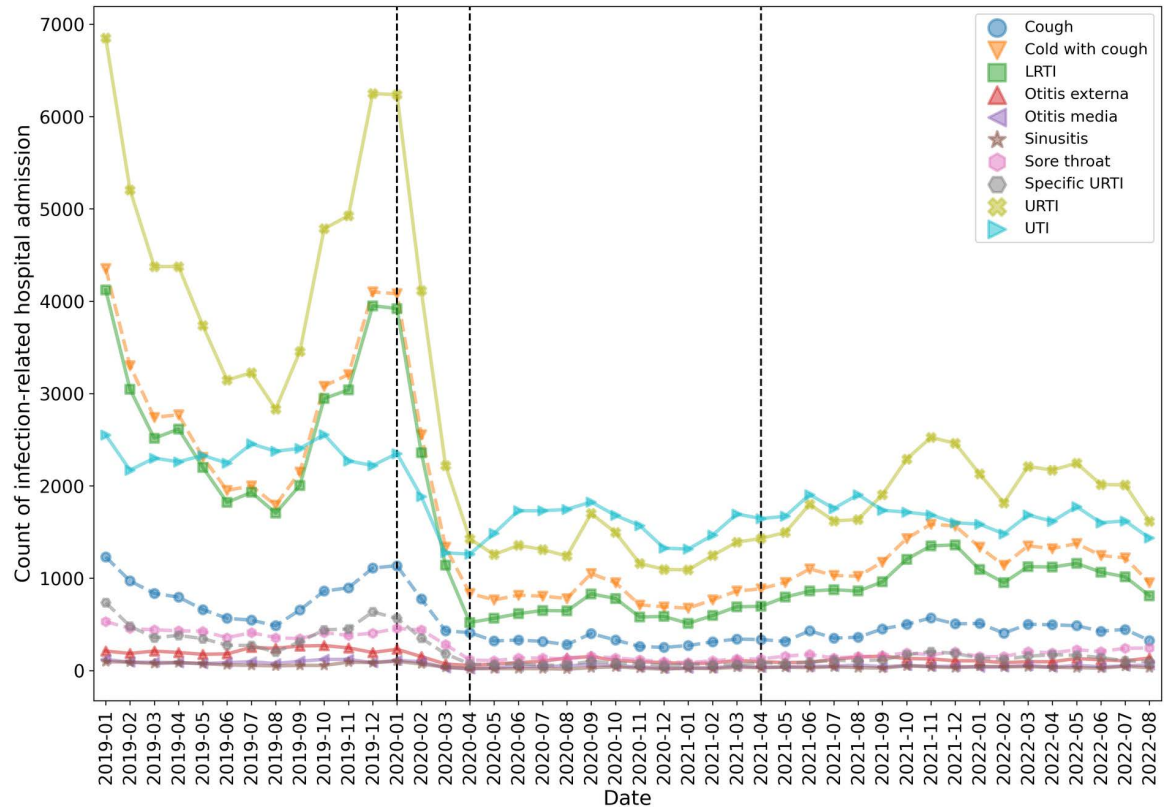

**Fig 2. Count of hospital admissions related to upper respiratory tract infections (URTI; including specific URTI, cough, cold with cough, and sore throat), lower respiratory tract infection (LRTI), urinary tract infection (UTI), sinusitis, otitis media, and otitis externa.**

<https://doi.org/10.1371/journal.pone.0321408.g001>
